# Supplementary material
Source: PubMed Central journal article supplement (PMC5728459)

**Supplemental Figure 1: AT-406 decreases the expression of cIAP1 in donor T cells and host non-hematopoietic target cells after allo-BMT.**

BALB/c animals received 8.5Gy on day -1 and were transplanted with  $0.5 \times 10^6$  CD90.2<sup>+</sup> splenic T cells along with  $5 \times 10^6$  T cell depleted bone marrow (TCD-BM) cells from either syngeneic BALB/c or allogeneic MHC mismatched B6 donors. Recipient animals received either AT-406 (10mg/kg) or its diluent subcutaneously on day-1, +1, +3, +5 and +7 after bone marrow transplantation (BMT). cIAP1 expression of donor CD3<sup>+</sup> T cells in the spleen and CD326<sup>+</sup> epithelial cells of small intestine was evaluated by FACS staining on day 8. A representative figure (left) and pooled data (right) from 5-8 animals are shown. The bar shows the mean  $\pm$  SEM.

**Supplemental Figure 2: AT-406 treatment increases pro-inflammatory cytokine production from donor T cells as well as elevated serum levels of cytokines after allo-BMT.**

(a-c) BALB/c animals received 8.5Gy on day -1 and were transplanted with  $0.5 \times 10^6$  CD90.2<sup>+</sup> splenic T cells along with  $5 \times 10^6$  TCD-BM cells from either syngeneic BALB/c or allogeneic MHC mismatched B6 donors. Recipient animals received either AT-406 (10mg/kg) or its diluent subcutaneously on day-1, +1, +3, +5 and +7 after BMT. (a-c) Expansion of donor TNF- $\alpha$  (a), IL-2 (b), and IL-17A producing T cells in spleens on day 14 after allo-BMT. n=4-5 per group, pooled from two experiments. The bar shows the mean  $\pm$  SEM.

**Supplemental Figure 3: Phenotypic analysis of various T cell subsets and activation markers in naïve B6-WT, B6-cIAP<sup>-/-</sup> and B6-XIAP<sup>-/-</sup> animals.**

Splenocytes were isolated from B6-WT, B6-cIAP<sup>-/-</sup> and B6-XIAP<sup>-/-</sup> animals that have not been transplanted (n=5-6 per group) and analyzed for their absolute number of CD4<sup>+</sup> and CD8<sup>+</sup> T cells (a),

naïve (CD44<sup>-</sup>CD62L<sup>+</sup>), effector memory (EM: CD44<sup>+</sup>CD62<sup>-</sup>) and central memory (CM: CD44<sup>+</sup>CD62L<sup>+</sup>) T cell subsets(b), activation marker CD69<sup>+</sup> expressed on CD4<sup>+</sup> and CD8<sup>+</sup> T cells (c) and regulatory T cells (Treg: CD4<sup>+</sup>CD25<sup>+</sup>Foxp3<sup>+</sup>)(d). The bar shows the mean ± SEM.

**Supplemental Figure 4: The absence of IAPs in donor T cells showed similar apoptosis with non-specific TCR stimulation and allogeneic T cell proliferation in MLR.**

(a-b) *In vitro* MLR. Isolated splenic CD90.2<sup>+</sup> T cells from either B6-WT, B6-cIAP1<sup>-/-</sup> or B6-XIAP<sup>-/-</sup> animals were cultured with BMDCs derived from syngeneic B6 or allogeneic BALB/c animals for 56 hours and supernatants were collected. IFN- $\gamma$  (a) and IL-2 (b) production of T cells was analyzed in the supernatants by ELISA. A representative figure from three independent experiments is shown. The bar shows the mean ± SEM. (c) Isolated splenic CD90.2<sup>+</sup> T cells from B6-WT animals were stimulated with anti-CD3 (2 $\mu$ g/ml) and anti-CD28 (1 $\mu$ g/ml) in the presence or absence of AT-406 (1 $\mu$ M) for 48 hours and analyzed for proliferation following <sup>3</sup>H-thymidine incorporation during the last 6 hours of incubation. The representative data from three independent experiments are shown. \*\*p<0.01.

**Supplemental Figure 5: IAPs levels in the intestinal epithelial cells is not associated with radiation toxicity.**

(a-b) B6-WT animals received 10Gy and IAPs levels in isolated CD326<sup>+</sup> cells from small and large intestine were tested by FACS at 24 and 48 hours after irradiation. (a) XIAP and (b) cIAP1 expression. n=3 per each group. \*p<0.05, \*\*\*p<0.001, \*\*\*\*p<0.0001. The bar shows the mean ± SEM. (c-e) B6-WT, XIAP<sup>-/-</sup>, cIAP1<sup>-/-</sup> animals received 9Gy, 13Gy, and 15Gy on day -1 and transplanted with 5x10<sup>6</sup>BM cells and 3x10<sup>6</sup> splenic T cell from syngeneic B6 animals. Survival, 9Gy (c), 13Gy (d), and 15Gy (e). n=3 per group. (f) B6-WT animals received 10Gy on day -1 and were transplanted with 3x10<sup>6</sup> CD90.2<sup>+</sup> splenic T

cells along with  $5 \times 10^6$  TCD-BM cells from syngeneic B6 donors. Histopathological score in GI tract on day 7 after irradiation was shown.  $n=3$  per group. The bar shows the mean  $\pm$  SEM.

**Supplemental Figure 6: Absence of IAPs in host exacerbates GVHD in allo-BMT.**

B6-WT and B6-XIAP<sup>-/-</sup> animals received 10Gy on day -1 and were transplanted with  $3 \times 10^6$  CD90.2<sup>+</sup> splenic T cells along with  $5 \times 10^6$  TCD-BM cells from either syngeneic B6 or allogeneic MHC-mismatched BALB/c donors. (a) GVHD clinical score.  $n=5-13$  per group. Pooled data from three independent experiments are shown. \*\*\* $P < 0.001$ , \*\* $p < 0.01$ , and \* $p < 0.05$ , when allo-WT control and allo-XIAP<sup>-/-</sup> animals are compared. (b) Donor T cell (H-2k<sup>d+</sup>CD4<sup>+</sup> or H-2k<sup>d+</sup>CD8<sup>+</sup>) expansion in spleen, liver and intraepithelial cells (IECs) on day 14 after allo-BMT ( $n=4-6$  per group, pooled from two experiments). The bar shows the mean  $\pm$  SEM. (c-f) Serum levels of IFN- $\gamma$  (c) and TNF- $\alpha$  (d) on day 14, and IL-6 (e) and IL-17 (f) on day 7 and 14 after allo-BMT ( $n=4-6$  per group, pooled from two experiments). \* $p < 0.05$ . The bar shows the mean  $\pm$  SEM. (g) GVHD clinical score at day 7 after allo-BMT. B6-WT and B6-cIAP1<sup>-/-</sup> animals received 10Gy on day -1 and were transplanted with  $3 \times 10^6$  CD90.2<sup>+</sup> splenic T cells along with  $5 \times 10^6$  TCD-BM cells from either syngeneic B6 or allogeneic MHC mismatched BALB/c donors.  $n=3-16$  per group. Pooled data from three independent experiments are shown. \*  $P < 0.05$ , when allo-WT control and allo-cIAP1<sup>-/-</sup> animals are compared.

**Supplemental Figure 7: Splenic DC phenotype and innate immune responses of B6-cIAP<sup>-/-</sup> or B6-XIAP<sup>-/-</sup> animals is comparable to B6-WT animals.**

(a-f) The absolute numbers of CD11c<sup>+</sup> cells expressing costimulatory molecules in spleens from B6-WT, B6-cIAP1<sup>-/-</sup> and XIAP<sup>-/-</sup> animals were analyzed ( $n=3$  per group). (a) The absolute number of CD11c<sup>+</sup> DCs. (b-f) The absolute number of costimulatory molecules on CD11c<sup>+</sup> DCs: (b) CD80, (c) CD86, (d) B7H1

(PD-L1) and (e) I-A<sup>b</sup> (class II) (f) CD40. \*p<0.05. (g-i) Both non-treated and AT-406 (1μM) pretreated BMDCs were harvested and stimulated with proteoglycan (5 μg/ml, g), Pam3CSK4 (300ng/ml, h) and HMGB-1 (5μg/ml, i) for 16 hours and were analyzed for the expression of CD80, CD86, I-A<sup>b</sup>, and B7H1 (PD-L1) by FACS. The data are representative of three independent experiments. The error bars show the mean ± SEM.

**Supplemental Figure 8: LC3, IL-22, and Lgr5 expression in CD326<sup>+</sup> cells of GI tract.**

(a) LC3-I and II expression was evaluated by western blot in the small intestine epithelial cells of transplanted animals on day 14 after BMT (left panel). The relative intensity of LC3-I and LC3-II bands were adjusted to actin. Graph showing the relative accumulation of total LC3-I and II (right panel). The bar shows the mean ± SEM. (b-c) IL-22 and Lgr5 expression in CD326<sup>+</sup> cells in small and large intestine in naïve B6-WT, cIAP1<sup>-/-</sup>, and XIAP<sup>-/-</sup> animals. n=3 per groups. The error bars show the mean ± SEM.

Supplemental Figure 1

clAP1

Donor CD3<sup>+</sup> T cells

CD326<sup>+</sup> Epithelial cells (SI)

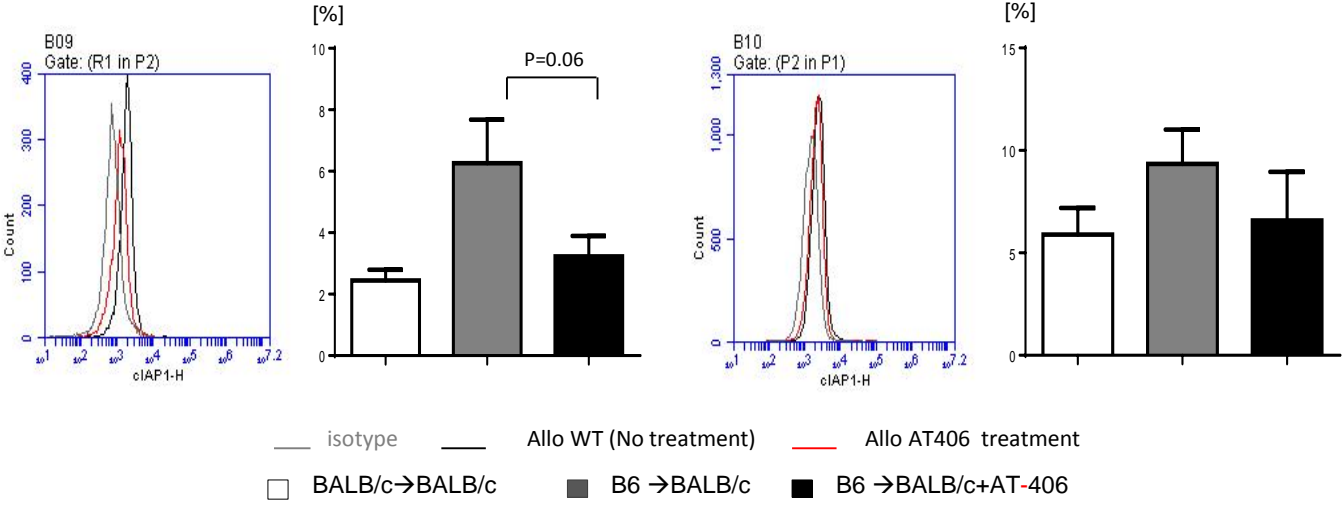

Supplemental Figure 2

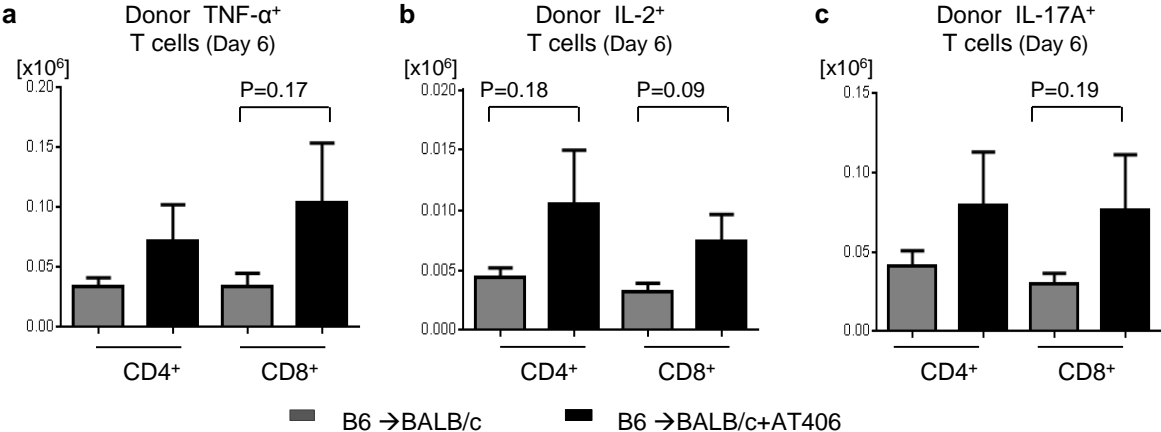

Supplemental Figure 3

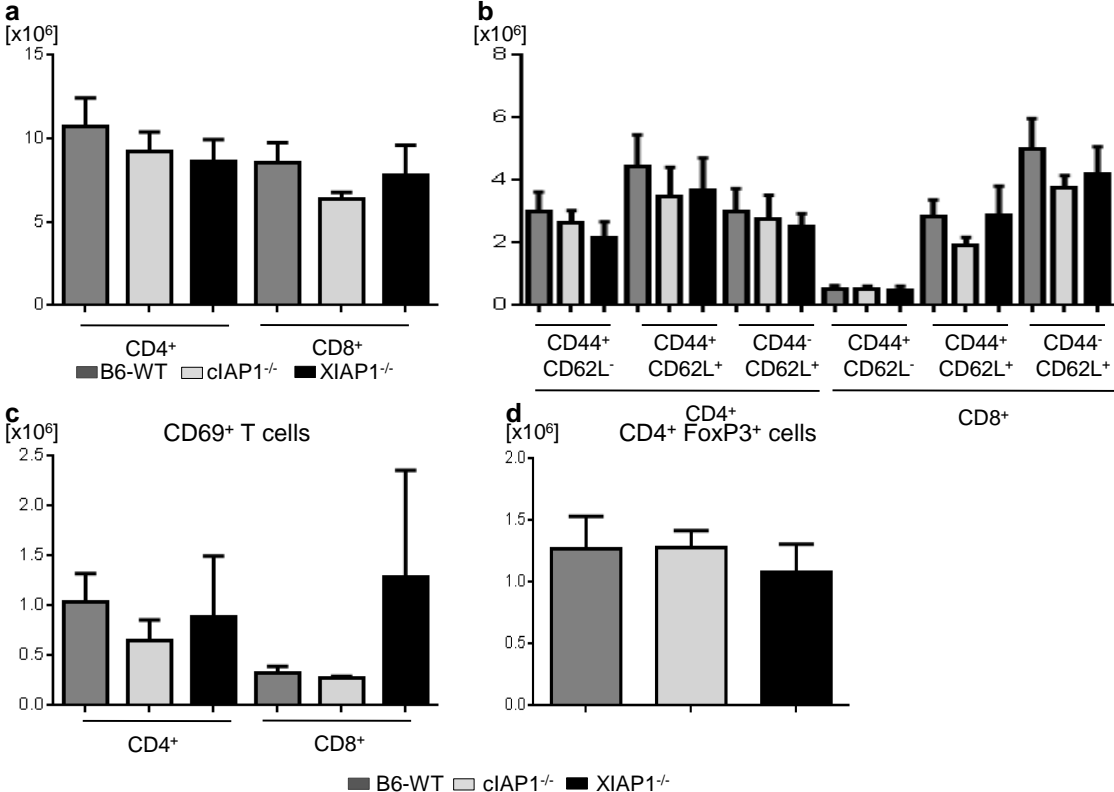

## Supplemental Figure 4

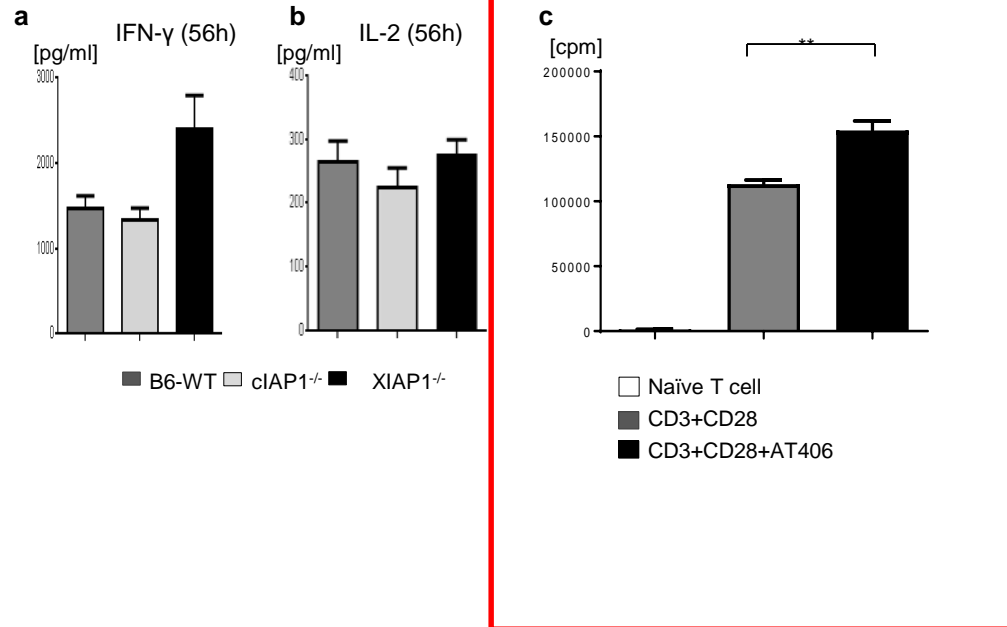



Supplemental Figure 5

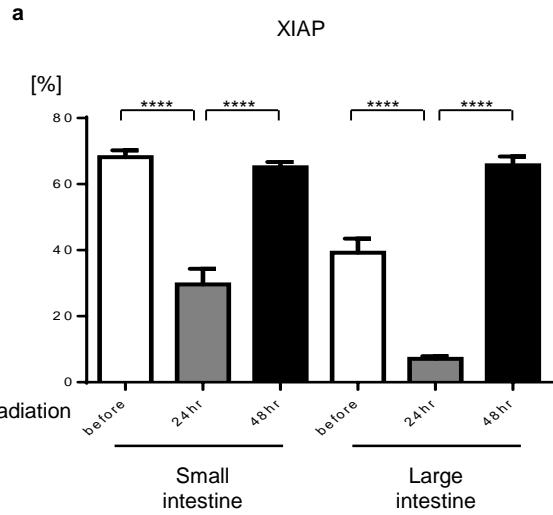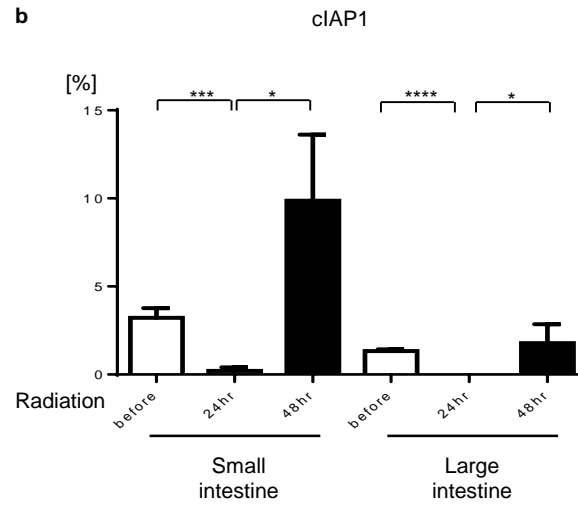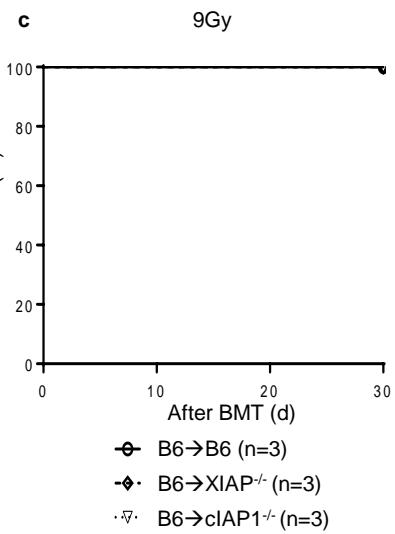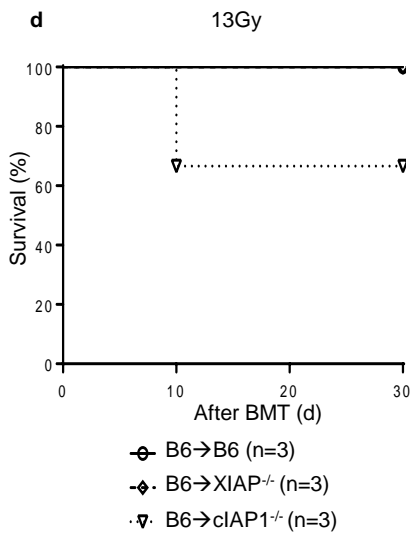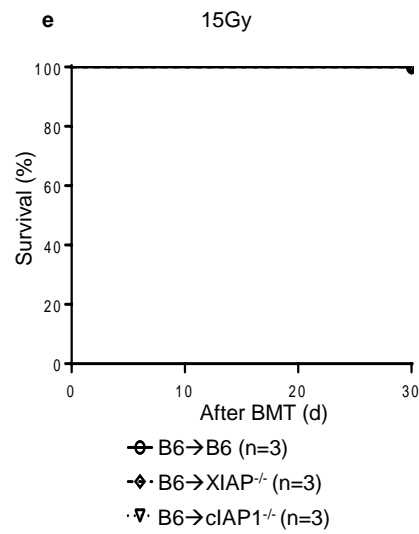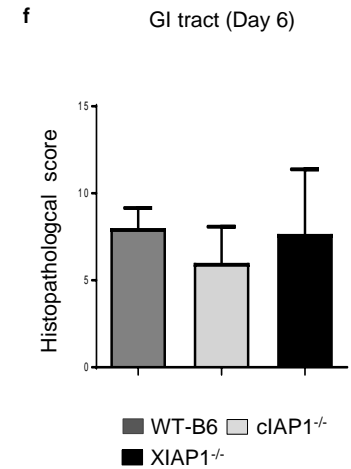

# Supplemental Figure 6

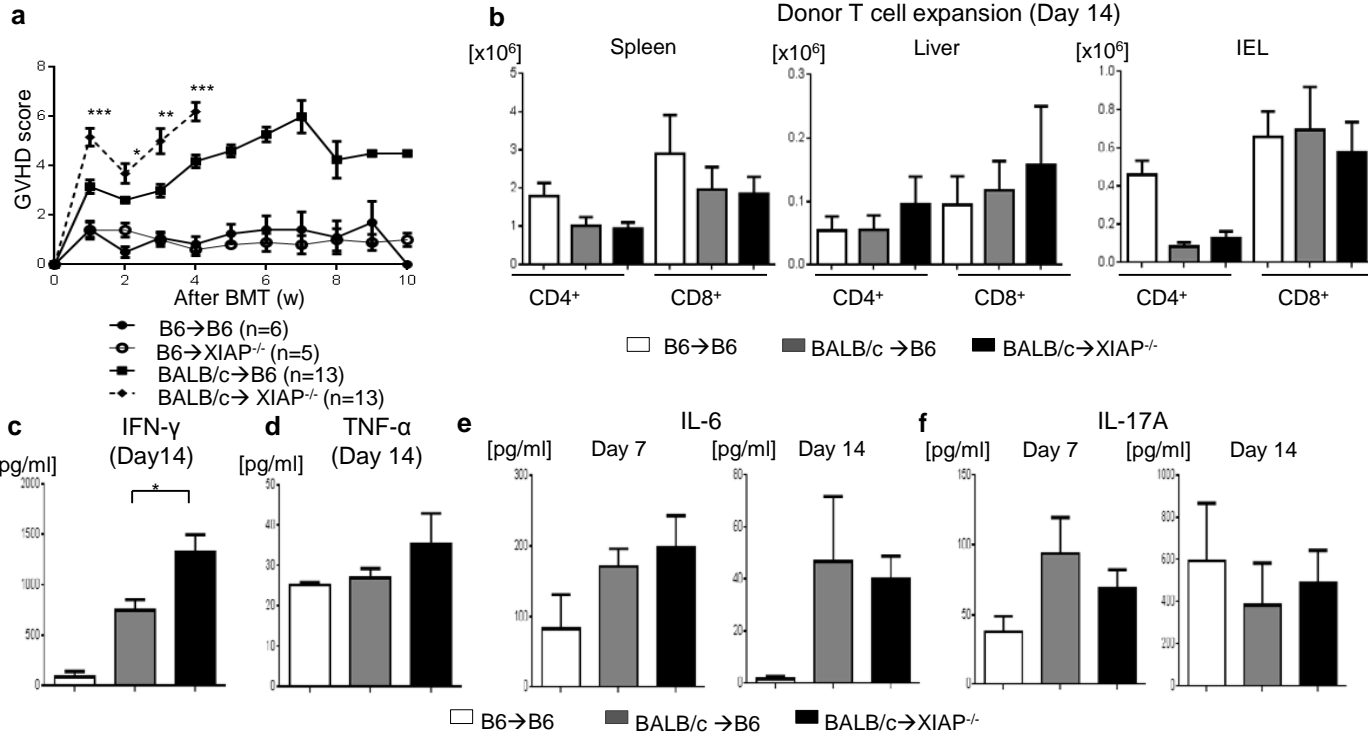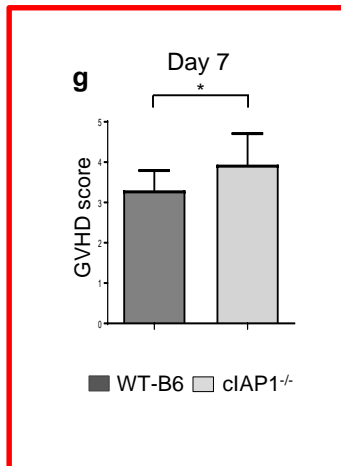

# Supplemental Figure 7

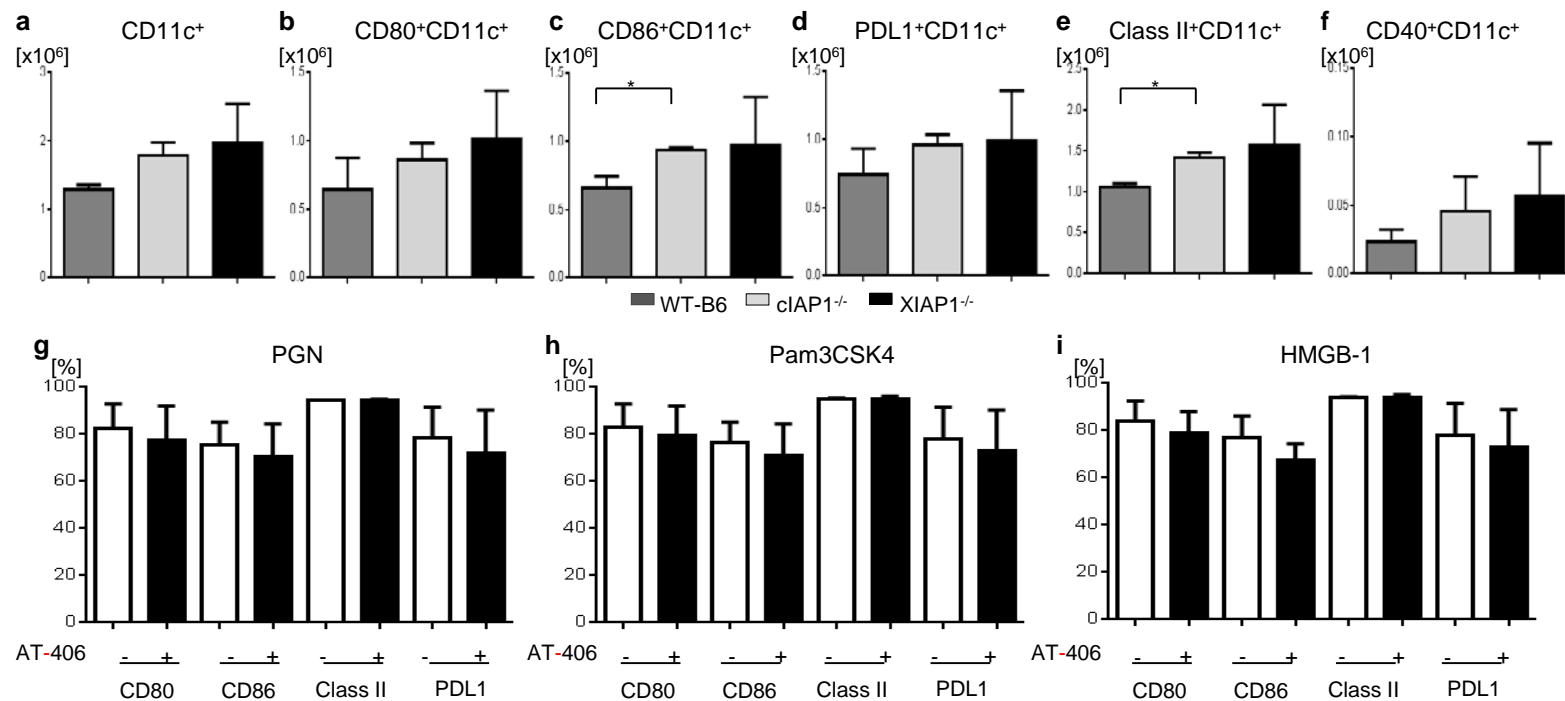

# Supplemental Figure 8

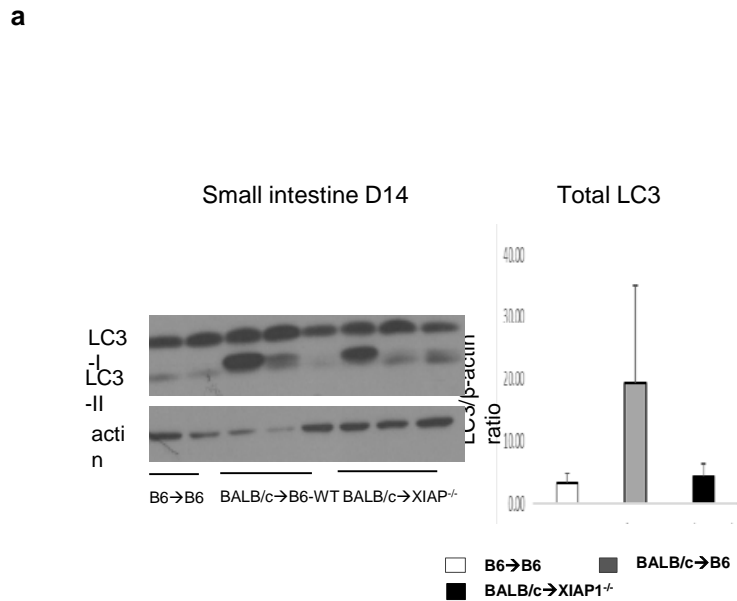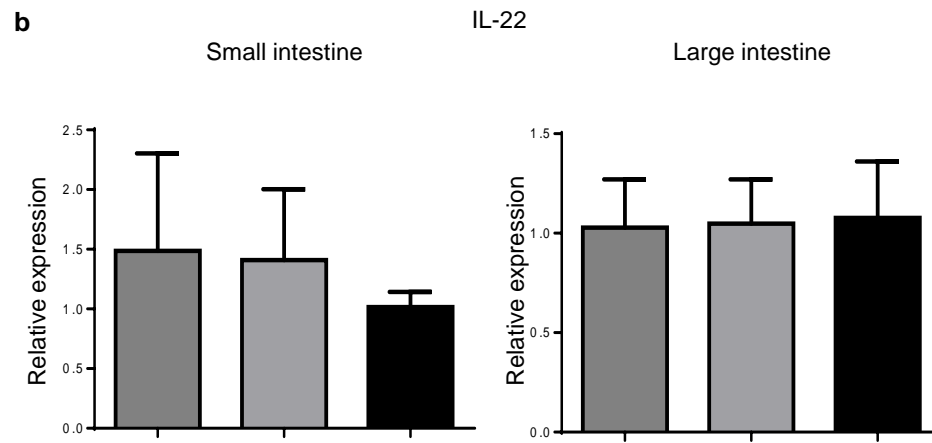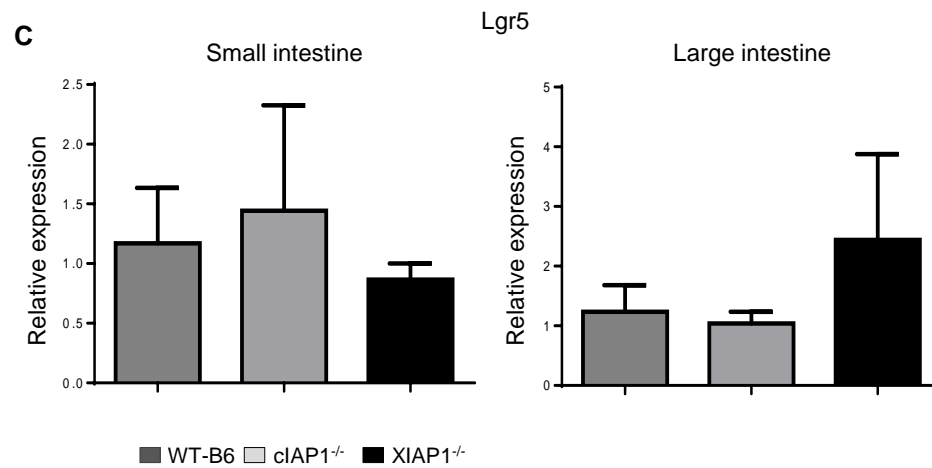

Supplement: ba004242-suppl1.pdf [file ba004242-suppl1.pdf]
